1 **Title: Thermal adaptation and fatty acid profiles of bone marrow and muscles in**  
2 **mammals: implications of a study of caribou (*Rangifer tarandus caribou*)**

3  
4 **Short title: Thermal implications of fatty acid composition of marrow and muscles in**  
5 **caribou**

6  
7

8 Authors: Eugène Morin<sup>1,2</sup>, Päivi Soppela<sup>3</sup> and P. Yvan Chouinard<sup>4</sup>

9

10 1) Trent University, Department of Anthropology, DNA Bldg Block C, 2140 East Bank Drive,  
11 Peterborough, Ontario, Canada K9J 7B8, eugenemorin@trentu.ca

12

13 2) Université de Bordeaux, PACEA, Bat. B18, Allée Geoffroy St-Hilaire CS 50023, 33615  
14 Pessac Cedex, France

15

16 3) Arctic Centre, University of Lapland, Pohjoisranta 4, P.O. Box 122, 96101 Rovaniemi,  
17 Finland

18

19 4) Université Laval, Département des sciences animales, Pavillon Paul-Comtois, Québec, Canada  
20 G1V 0A6

21

22

## 23 **Abstract**

24 Mammals have evolved several physiological mechanisms to cope with changes in  
25 ambient temperature. Particularly critical among them is the process of keeping cells in a fluid  
26 phase to prevent metabolic dysfunction. In this paper, we examine variation in the fatty acid  
27 composition of bone marrow and muscle tissues in the cold-adapted caribou (*Rangifer tarandus*  
28 *caribou*) to determine whether there are systematic differences in fatty acid profiles between  
29 anatomical regions that could potentially be explained by thermal adaptation. Our results indicate  
30 that the bone marrow and muscle tissues from the appendicular skeleton are more unsaturated  
31 than the same tissues in the axial skeleton, a finding that is consistent with physiological  
32 adaptation of the appendicular regions to thermal challenges. Because mechanisms of thermal

33 adaptation appear to be widely shared among terrestrial mammals, we suggest that the same  
34 patterns may prevail in other species, possibly including humans.

35

36

37 Keywords: thermal adaptation; fatty acids; lipids; bone marrow; meat; muscles; intramuscular fat

## 38 **Introduction**

39           How mammals, including humans, adapt to changes in ambient temperature has long  
40 been a focus of intensive research in biology (Schmidt-Nielsen 1946; Irving and Krog 1955;  
41 Irving et al. 1957; Meng et al. 1969; Soppela et al. 1986). A critical challenge that all mammals  
42 must face is to maintain their high internal body temperature by conserving heat in cold weather  
43 and dissipating heat in hot weather and/or when the animal is conducting long, vigorous activity  
44 (Blix 2005). At the scale of individual cells, the problem concerns how the physical properties of  
45 the membrane and its composition can be modified in order to dynamically maintain a fluid  
46 (liquid-crystalline) phase under challenging thermal conditions (Hochachka and Somero 2002).  
47 At low temperatures, this means keeping the cell away from a gel phase, whereas at high  
48 temperature it implies avoiding the development of inverted hexagonal phase structure and  
49 membrane fusion (Hazel 1995). Avoiding these changes in phase or structure is crucial because  
50 they can have deleterious effects on cell function (Stillwell 2016), and at a larger scale, may  
51 result in stiff or loose tissues, with potentially adverse effects on locomotion, food procurement  
52 and the ability of an animal to respond swiftly in contexts of predation. In conditions of low  
53 ambient temperature, a common pattern seen in cells is desaturation, which consists in increased  
54 proportion of unsaturated fatty acids (FA) at the expense of saturated FA. At high ambient  
55 temperatures, these changes are commonly reversed (Hochachka and Somero 2002; Denlinger  
56 2010; Stillwell 2016, Pond 2017). In this paper, we examine how the FA composition of skeletal  
57 marrow from different parts of the body varies—likely in response to thermal challenges (Meng  
58 et al. 1969)—in a species of cold climate, the caribou (*Rangifer tarandus caribou*). The FA  
59 composition in bone marrow is also compared with that of skeletal muscles to determine whether  
60 this tissue is similarly affected by exposure to ambient temperature.

61 Bone marrow adipocytes (BMA) are metabolically active cells that are currently  
62 intensively studied because they act as an energy reservoir, secrete important proteins (e.g.,  
63 adiponectin, leptin) and influence local marrow processes, osteogenesis and systemic  
64 metabolism, among other functions (Li et al. 2018; Hawkes and Mostoufi-Moab 2019;  
65 Weldenegodguad et al. 2021). In humans, the formation of BMA occurs at or shortly prior to  
66 birth with these cells gradually replacing hematopoietic tissue. This process follows a well  
67 established distal-to-proximal sequence: BMA first form in the terminal phalanges, then develop  
68 in the long bones, and later expand into the axial skeleton (Tavassoli and Yoffey 1985). Within  
69 individual long bones, BMA first form at mid-shaft, then occur in the distal metaphysis, and  
70 ultimately invade the proximal metaphysis (Kricun 1985; Moore and Lawson 1990). Importantly,  
71 these developmental trends are not unique to humans and have been observed in many mammal  
72 species, including rodents, ungulates, and carnivores (e.g., Goodman 1952; Day 1977).

73 Recent studies have uncovered important molecular, functional and morphological  
74 differences between subtypes of BMA. In the metaphyseal regions of the long bones—loci  
75 generally associated with active hematopoiesis—BMA represent only approximately 45% of the  
76 cellular component in adults, which contrasts with their abundance in long bone cavities where  
77 they can constitute as much as 90% of the cellular tissue (Snyder et al. 1975; Lecka-Czernik et al.  
78 2018). The BMA found in hematopoietic regions also tend to be of smaller size, to be more  
79 dispersed, to develop later and to be more easily mobilized than the BMA found in the shaft  
80 cavities of the same bones. Moreover, BMA in metaphyseal and diaphyseal regions have been  
81 shown to differ in terms of patterns of regulation and gene expression (Scheller et al. 2015; Craft  
82 et al. 2018). As a result of these differences, the adipocytes from the metaphyseal regions have  
83 been termed regulated BMA (rBMA, or “red marrow” in the older literature), whereas those

84 found in the diaphyses or shafts of long bones are called constitutive BMA (cBMA, or “yellow  
85 marrow” in early publications) (Scheller et al. 2015).

86           Research on terrestrial mammals has shown that the FA composition of BMA is  
87 influenced by several factors, including the anatomical locus under investigation as well as the  
88 age, diet, health, and gender of the individual (Tavassoli and Yoffey 1985; Soppela and  
89 Nieminen 2001, Huovinen et al. 2015, Steiner-Bogdaszewska et al. 2022). Because the FA  
90 composition of BMA appears to be influenced by tissue temperature, and indirectly by ambient  
91 temperature (Meng et al. 1969; Turner 1979; Pond et al. 1993; Käkälä and Hyvärinen 1996,  
92 Soppela and Nieminen 2001), comparing patterns in the axial skeleton with that from the more  
93 heterothermic limbs may yield important insights on the interactions between cell function and  
94 thermal challenges. For instance, cBMA are known, to increase in unsaturation towards the  
95 extremities, and are thus kept fluid, in order to prevent stiffness at low temperatures (Meng et  
96 al. 1969; Turner 1979; Pond et al. 1993; Käkälä and Hyvärinen 1996; Soppela and Nieminen  
97 2001). Whether this pattern also applies to the adjacent muscles and to cells in the metaphyseal  
98 regions is poorly known. This issue is important because, unlike cBMA, intramuscular fat in lean  
99 animals has a high content of structural lipids such as phospholipids and cholesterol (Leat and  
100 Cox 1980; Lawrie and Ledward 2006; Wood et al. 2008), an observation that likely extends to  
101 the marrow in the metaphyseal regions given its hematopoietic functions. How the FA  
102 composition of muscle and bone marrow tissues varies within an animal and how these tissues  
103 are influenced by ambient temperature is understudied (but see Irving and Krog 1955; Hammel et  
104 al. 1962; Johnsen et al. 1985). The present study addresses this problem by investigating changes  
105 in the FA composition of these tissues across a large number of different anatomical sites in

106 caribou. We also explore the implications of these variations for our understanding of the thermal  
107 adaptation of mammals.

108

## 109 **Materials and Methods**

110

### 111 *Sample collection*

112 Whereas many previous studies of FA composition in wild mammals have investigated a  
113 single category of tissue (e.g., adipose tissue, bone marrow or a specific skeletal muscle) sampled  
114 across a large number (e.g., >10) of individuals at a small number of anatomical sites (e.g., 1–5  
115 sites), here we used a different approach and focused on intra-individual variation. For this study,  
116 FA variation was examined at a large number of anatomical sites ( $n=56$  per individual) in  
117 caribou, with special attention being paid to a wide range of soft tissues, including backfat, skin,  
118 skeletal muscle, lungs and trachea, and bone marrow. This sampling strategy allows for a  
119 detailed picture of FA profile variation within a cold-adapted mammal.

120 For this analysis, two already eviscerated female ( $\geq 6$  year-old) caribou (*Rangifer*  
121 *tarandus caribou*) were sampled. Both free-ranging caribou were killed by hunters around  
122 February 7–10, 2007 in the Robert-Bourassa Reservoir (53°45'N, 77°00'W; female A) and the  
123 Caniapiscau region (53°00'N, 68°30'W; female B) in central Québec where average temperature  
124 is around -23°C in January and 13°C in July (Schefferville airport weather station). Carcass  
125 weights (excluding organs, viscera, brain and antlers) were 64 and 61 kg, respectively. The two  
126 animals were, based on visual inspection, apparently in good condition and showed no signs of  
127 pathology or being starved. Whether the animals were pregnant or not is unknown. As part of the  
128 meat aging process, carcasses were kept in a refrigeration facility (at ca 4°C) for about two weeks

129 prior to processing by a commercial butcher. Fatty acid profiles were derived for a total of 112  
130 samples (56 per caribou) collected from the skin, lungs and trachea, various muscles, and the  
131 bone marrow from most classes of skeletal elements (in the case of long bones, samples were  
132 taken from the metaphyseal and shaft portions of the bones). Figure 1 shows the anatomical  
133 location of the samples.

134

### 135 *FA extraction and analysis*

136 How the marrow was obtained requires additional description. Because the FA analysis  
137 was performed with the aim of shedding light on human foraging decisions in prehistoric  
138 contexts—a topic that will be the focus of another publication—the marrow from the shaft cavity  
139 (diaphyseal marrow) of the long bones (humerus, radio-ulna, femur, tibia and metapodials) was  
140 extracted after breaking the bones using a pebble and a stone anvil as documented in a wide  
141 range of subsistence-based societies (Morin 2020). After the long bone shaft cavity was  
142 breached, a few grams of the exposed diaphyseal marrow was cut using a knife and then frozen  
143 in a plastic bag in a commercial freezer prior to FA analysis. One sample each was taken from  
144 the proximal and distal ends of the marrow plug. The cancellous marrow samples (marrow in the  
145 axial skeleton and girdles, carpals, tarsals, and metaphyseal regions of long bones; Fig 1) were  
146 obtained by crushing the specimen using the same stone-and-anvil method. This crushing yielded  
147 a product similar to bone meal or bone paste. This means that while the marrow extracted from  
148 the shaft cavity of the long bones was largely fat-like (or fatty) tissue and free of bone fragments,  
149 the crushed cancellous bone samples consisted of marrow-rich bone meal. As the bone tissue  
150 itself—that is excluding the soft tissue found in the trabeculae—contains very little fat (Higgs et  
151 al. 2011), endogenous bone fat is not expected to impact our results. The muscle samples

152 consisted of small remnants of meat adhering to the bone, which were cut off after the main  
153 muscle masses had been removed by the butcher.

154         Prior to the FA analysis, all tissues were manually triturated with a scalpel to obtain a  
155 homogenized product. The crude fat—which includes all types of lipids (triacylglycerols,  
156 phospholipids and cholesterol esters)—from the muscle and marrow samples was extracted using  
157 the method presented in Folch et al. (1957), as modified by Dryer et al. (1970) who  
158 recommended adding methanol in two separate aliquots in the initial steps of the procedure. Total  
159 FA (different lipid classes were not separated) in extracted lipids were then transesterified  
160 according to the method described by Chouinard et al. (1997) using 100  $\mu$ l of 0.5 M Na in  
161 methanol per ca 10 mg fat in 1 mL of hexane. Determination of the fatty acid profile was carried  
162 out with a gas chromatograph (HP 5890A Series II, Hewlett Packard, Palo Alto, CA) equipped  
163 with a 100-m CP-Sil 88 capillary column (Chrompack, Middelburg, the Netherlands) and a flame  
164 ionization detector, as described by Faucitano et al. (2008). The melting point of fat extracted  
165 from each sample was estimated as the weighted sum of the melting point of individual FA, as  
166 described by Toral et al. (2013). The comparisons that we performed include an examination of  
167 different indices, including the  $\Delta^9$  desaturase index, the percentage of polyunsaturated FA  
168 (PUFA), the percentage of short chain saturated FA (Fig 3c) and the n-6/n-3 ratio. How these  
169 were calculated is presented in the accompanying figures and tables. For comparative purposes,  
170 we derived melting points from the caribou FA profiles published by Meng et al. (1969). Note  
171 that there are systematic differences between the two datasets likely because their earlier analyses  
172 could not identify certain categories of FA that can now be routinely identified, thanks to  
173 progress in gas chromatograph technology. The results that we present below begin with the



174 limbs, as the FA composition of these body parts has previously been shown to be influenced by  
175 exposure to ambient temperature.

176 For comparison purposes, we calculated a number of percentages and ratios. The  
177 summed percentage of PUFA (%PUFA) includes the following FA: *cis*-9,12 18:2; *cis*-9,12,15  
178 18:3; *cis*-6,9,12,15 18:4; *cis*-11,14 20:2; *cis*-8,11,14 20:3; *cis*-5,8,11,14 20:4; *cis*-5,8,11,14,17  
179 20:5; *cis*-7,10,13,16 22:4; *cis*-4,7,10,13,16 22:5; *cis*-7,10,13,16,19 22:5; *cis*-4,7,10,13,16,19 22:6.  
180 The percentage of short chain saturated FA (%short chain saturated FA) focuses on the summed  
181 presence of 14:0 + 15:0. The following equation was used to derive the  $\Delta^9$  desaturase index: (*cis*-  
182 9 14:1 + *cis*-9 16:1 + *cis*-9 18:1)/(14:0 + *cis*-9 14:1 + 16:0 + *cis*-9 16:1 + 18:0 + *cis*-9 18:1). This  
183 index was selected because it includes FA that are likely to have a significant impact on melting  
184 point. The n-6/n-3 ratio was calculated using this formula: n-6 PUFA/n-3 PUFA.

185

### 186 *Statistical analysis*

187 Differences in means between diaphyseal and other bone regions were assessed using  
188 unpaired two-tailed t-tests. In these analyses, the mean FA value for the two animals was  
189 averaged across all diaphyseal regions (n = 12) and compared with the corresponding value for  
190 all metaphyseal regions (n = 12) or axial bones (n = 6) (see Table 1, note 2–3 for a list of the  
191 relevant bones or bone regions).

192

## 193 **Results**

194 In the shaft cavity of the long bones, the percentage of total lipids is high ( $74.9 \pm 5.0\%$ ,  
195 n = 12, Table 1) as is the percentage of FA calculated on a crude fat basis ( $80.2 \pm 4.5\%$ , n = 12,  
196 Table 1). In comparison, the percentage of FA is significantly lower in the metaphyseal portions

197 of the same bones ( $73.8 \pm 4.8\%$ ,  $n = 12$ , Table 1,  $t = 3.37$ ,  $p = 0.0028$ ) and the axial skeleton  
198 ( $74.6 \pm 4.3\%$ ,  $n = 6$ , Table 1,  $t = 2.523$ ,  $p = 0.0226$ ). These lower values are likely due to an  
199 increased representation of membrane lipids in the latter samples, which is consistent with their  
200 known hematopoietic function. However, the metaphyseal regions of the distal metapodials  
201 (metatarsals and metacarpals) may represent an exception to this trend as they show only minor  
202 differences in FA composition when compared to the adjacent diaphyseal marrow (Fig 2a). We  
203 also note that the muscle tissues show low percentages of total lipids and FA, which suggests a  
204 low proportion of adipocytes in these tissues.

205         The gas chromatography analysis allowed the identification and quantification of 33  
206 different FA varying from 14 to 22 carbon chain lengths (Table 2). In the appendicular skeleton,  
207 we note a gradual increase in the proportion of the *cis*-9 monounsaturated FA (MUFA) as one  
208 progresses away from the body core (Table 2). This increase is primarily expressed in the form of  
209 a greater representation of oleic acid (*cis*-9 18:1) and, to a lesser extent, palmitoleic acid (*cis*-9  
210 16:1) in the extremities. Conversely, a gradual decrease in several classes of saturated FA—  
211 mostly palmitic acid (16:0) and stearic acid (18:0)—is observed distally. These changes in the  
212 FA composition of appendicular marrow produce a steady decrease in average fat melting point  
213 as one moves toward the extremities (Fig 2b). However, the average melting point of the  
214 metaphyseal regions is consistently lower than predicted by the FA pattern for diaphyseal  
215 marrow (Fig 2b, Tables 2–3). These lower melting points may signal an increased presence of  
216 lipids from membranes in metaphyseal regions, which is consistent with the higher percentages  
217 of PUFA observed in the same regions (Fig 2c). When compared to the shaft regions and  
218 excluding the metapodials, the metaphyseal regions also show higher values for the  $\Delta^9$  desaturase

219 index (Fig 2d) and lower percentages of short chain saturated FA (Fig 2e). In contrast, changes in  
220 the n-3/n-6 ratio are small (Fig 2f).

221 A comparison of the limbs with the axial skeleton shows several interesting patterns. In  
222 muscle tissues, values for the  $\Delta^9$  desaturase index are systematically lower in the body core  
223 (tongue to sternum:  $0.360 \pm .011$ ,  $n = 6$ ) than in the limbs (scapula to tibia:  $0.486 \pm .041$ ,  $n = 6$ ,  
224  $t = 7.2705$ ,  $p < 0.0001$ , Fig 3a), a trend also observed in cancellous marrow (cervical to sternum:  
225  $0.332 \pm .021$ ,  $n = 5$ ; scapula to distal metatarsal:  $0.559 \pm .132$ ,  $n = 16$ ,  $t = 3.7649$ ,  $p = 0.0013$ , Fig  
226 3b). We note that the percentage of short chain saturated FA (Fig 3c) and the n-6/n-3 ratio (Table  
227 3) are higher in the cancellous marrow of the axial skeleton than that of the limbs where patterns  
228 of steady decrease are observed as one proceeds distally (Fig 3c–d).

229

## 230 **Discussion**

231 Previous research on the thermal adaptation of limbs in cold-adapted mammals has  
232 largely focused on FA variation in the cBMA of long bones with occasional comparisons with  
233 other types of soft tissues (Meng et al. 1969; Käkälä and Hyvärinen 1996; Soppela and Nieminen  
234 2001). In the present study, the FA profiles of a wide range of lipid-containing tissues in caribou  
235 were compared between and within different anatomical locations. Most of the bone marrow and  
236 muscle samples that we examined varied in terms of lipid proportions. The FA profiles suggest  
237 that the diaphyseal marrow and backfat are dominated by triacylglycerols derived from  
238 adipocytes (loosely connected with collagen) whereas the other tissues—such as muscles, and  
239 perhaps, rBMA—appear to show greater proportions of phospholipids and cholesterol esters  
240 derived from cell membranes.

241 In comparison to the shaft regions, the metaphyseal regions show higher values for the  
242  $\Delta^9$  desaturase index, higher percentages of PUFA and lower percentages of short chain saturated  
243 FA. These trends are compatible with significant hematopoietic activity in the articular ends of  
244 the long bones (Tavassoli and Yoffey 1985) and with increased desaturation in the extremities of  
245 caribou/reindeer (Meng et al. 1969; Pond et al. 1993; Soppela and Nieminen 2001). In agreement  
246 with Meng et al.'s (1969) observations about the FA composition of cBMA, the diaphyseal  
247 regions of the long bones show a pattern of desaturation toward the extremities, which  
248 contributes to lowering the melting point of the adipose tissues. A similar trend is seen in the  
249 metaphyseal regions. The distal decrease in melting point in diaphyseal and metaphyseal regions  
250 supports the hypothesis of a physiological adaptation of the lipid component of cells to the  
251 marked heterothermia that may be displayed in reindeer legs (Irving & Krogh 1955, Johnsen et  
252 al. 1985). This is because a low melting point allows for soft tissues of the peripheral parts—  
253 including extremities that are less insulated and are allowed to cool more than the trunk in order  
254 to limit heat loss rate—to remain supple when facing cool thermal conditions.

255 It is known that FA with a higher degree of unsaturation—especially those high in PUFA  
256 with their double bonds located near the methyl end—can, when need arises, be mobilized more  
257 readily than saturated FA (Gavino and Gavino 1992; Raclot and Groscolas 1993; Connor et al.  
258 1996; Raclot et al. 1995). For instance, in situations of impaired energy balance, unsaturated and  
259 long-chain FA are preferentially mobilized from triacylglycerols of adipose tissues (Soppela and  
260 Nieminen 2002, Nieminen et al. 2006, Mustonen et al. 2009), including bone marrow fat  
261 (Soppela and Nieminen 2001) and brown adipose tissue (Groscolas and Herzberg 1997).  
262 However, additional work will be needed to assess whether there are differences in the fat  
263 mobilization process between rBMA and cBMA.

264 Our analysis also shows important differences between the metaphyseal and diaphyseal  
265 portions of the long bones, the former regions showing higher percentages of PUFA, higher  
266 values for the  $\Delta^9$  desaturase index and lower melting points. In the caribou females that we  
267 sampled, both scored as prime adults, the metaphyseal regions of the long bones were apparently  
268 actively involved in hematopoiesis. If confirmed, this result would be consistent with  
269 observations made in humans and many other mammals (Tavassoli and Yoffey 1985).

270 Previous studies that compared different muscles in terrestrial mammals have often  
271 stressed the lack of FA variation in intramuscular fat between muscles of single animals  
272 (Nikolaidis and Mougios 2004; Wood et al. 2008) and in patterns of FA desaturation between  
273 species living at different latitudes (Guerrero and Rogers 2019). Our results show relatively  
274 minor changes in FA composition between different muscles in the axial skeleton. However, the  
275  $\Delta^9$  desaturase index shows clear and apparently systematic differences in the muscles between  
276 the axial and appendicular skeleton. The pattern that we uncovered is consistent with  
277 appendicular muscle tissues being more unsaturated than those of the axial skeleton (Pond et al.  
278 1992, 1993; Mustonen et al. 2007), presumably as an adaptation to the cooler temperature seen in  
279 the limbs of mammals due to their thermoregulatory vasoconstrictor responses aimed at  
280 minimizing limb heat loss. As a last point, it is well established that PUFA are critical in  
281 influencing the fluidity, permeability and protein binding functions of cell membranes. The  
282 changes in PUFA abundance seen in the bone marrow and muscle tissues that we examined are  
283 in agreement with this interpretation.

284

285 **Conclusion**

286           It is increasingly clear that the rBMA in the metaphyseal regions differ morphologically  
287 and functionally from that found in the cBMA of diaphyseal regions (Scheller et al. 2015; Craft  
288 et al. 2018). Assuming that our interpretation of BMA distribution in the limb samples is correct,  
289 our analysis suggests that cBMA and rBMA vary systematically in terms of FA composition,  
290 with both subtypes of adipocytes showing a distal increase in the degree of unsaturation and an  
291 overall decrease in fat melting point in the limbs. While variation in FA composition seems  
292 limited in muscles of the body core, the cell membranes of muscle tissues show patterns of  
293 change of FA in the limbs, including an increase in the  $\Delta^9$  desaturase index, that are consistent  
294 with an adaptation to exposure to ambient temperature. Given that patterns of thermoregulation  
295 seem widely shared among terrestrial mammals—with frequent contrasts being seen between the  
296 warmer core and the more heterothermic extremities and appendages—we suggest that the trends  
297 of FA composition that we observed in the appendicular skeleton of caribou is also characteristic  
298 of other species, possibly including humans.

299

### 300 **Acknowledgments**

301           Funding was provided through a grant from the Laboratoire d'Archéométrie de  
302 l'Université Laval. We would like to thank Lars Folkow, Sanna-Mari Kynkäänniemi, Vassili  
303 Mougios, Petteri Nieminen, Cara Ocobock, Jürgen Steinmeyer and Glenn Tattersall for their  
304 insightful observations and several useful discussions regarding the implications of our data.

305

### 306 **References**

307 Blix AS. Arctic animals and their adaptations to life on the edge. Trondheim: Tapir Academic  
308 Press; 2005.

- 309 Chouinard PY, Lévesque J, Girard V, Brisson GJ. Dietary soybeans extruded at different  
310 temperatures: milk composition and in situ fatty acid reactions. *J Dairy Sci.*  
311 1997;80:2913–24.
- 312 Connor WE, Lin DS, Colvis C. Differential mobilization of fatty acids from adipose tissue. *J*  
313 *Lipid Res.* 1996;37:290–8.
- 314 Craft CS, Li Z, MacDougald OA. Molecular differences between subtypes of bone marrow  
315 adipocytes. *Curr Mol Biol Rep.* 2018;4:16–23.
- 316 Day LR. Composition of bone marrow in lamb. M.Sc. Thesis, University of Wyoming. 1977.
- 317 Denlinger DL, Lee RE. Low temperature biology of insects. New York: Cambridge University  
318 Press; 2010.
- 319 Dryer RL. The lipids. In: Tietz NW, editor. *Fundamentals of clinical chemistry*. Philadelphia:  
320 WB Saunders Company; 1970. p. 302–61.
- 321 Faucitano L, Chouinard PY, Fortin J, Mandell I, Lafrenière C, Girard CL, Berthiaume R.  
322 Comparison of alternative beef production systems based on forage finishing or grain-  
323 forage diets with or without growth promotants: 2. Meat quality, fatty acid composition  
324 and overall palatability. *J Anim Sci.* 2008;86:1678–89.
- 325 Folch J, Lees M, Stanley GS. A simple method for the isolation and purification of total lipides  
326 from animal tissues. *J Biol Chem.* 1957;226:497–509.
- 327 Gavino VC, Gavino GR. Adipose hormone-sensitive lipase preferentially releases  
328 polyunsaturated fatty acids from triglycerides. *Lipids.* 1992;27:950–4.
- 329 Goodman DC. Quantitative studies on the distribution of lipids in the bone marrow of the rat,  
330 pig, and cat. *Trans Kans Acad Sci.* 1952;55:214–22.

- 331 Groscolas R, Herzberg GR. Fasting-induced selective mobilization of brown adipose tissue fatty  
332 acids. *J Lipid Res.* 1997;38:228–38.
- 333 Guerrero AI, Rogers TL. From low to high latitudes: changes in fatty acid desaturation in  
334 mammalian fat tissue suggest a thermoregulatory role. *BMC Evol Biol* [Internet]. 2019  
335 Dec 26;19(1):155. Available from:  
336 <https://bmcevolbiol.biomedcentral.com/articles/10.1186/s12862-019-1473-5>
- 337 Hammel H, Houtp T, Anderson K. Thermal and metabolic measurements on a reindeer at rest  
338 and in exercise. AAL-TDR 61. Fort Wainwright, Alaska: Arctic Aeromedical Laboratory,  
339 Aerospace Medical Division; 1962.
- 340 Hawkes CP, Mostoufi-Moab S.. Fat-bone interaction within the bone marrow milieu: impact on  
341 hematopoiesis and systemic energy metabolism. *Bone.* 2019;119:57–64.
- 342 Hazel JR. Thermal adaptation in biological membranes: Is homeoviscous adaptation the  
343 explanation? *Ann Rev Physiol.* 1995;57:19–42.
- 344 Higgs ND, Little CTS, Glover AG. Bones as biofuel: a review of whale-bone composition with  
345 implications for deep-sea biology and palaeoanthropology. *Proc R Soc B.* 2011;278:9–17.
- 346 Hochachka PW, Somero GN. Biochemical adaptation: mechanism and process in physiological  
347 evolution. New York: Oxford University Press; 2002.
- 348 Huovinen V, Viljakainen H, Hakkarainen A, Saukkonen T, Toiviainen-Salo S, Lundbom N,  
349 Lundbom J, Mäkitie O. Bone marrow fat unsaturation in young adults is not affected by  
350 present or childhood obesity, but increases with age: a pilot study. *Metabolism.* 2015;  
351 64(11):1574-1581.
- 352 Irving L, Krog J. Temperature of skin in arctic as a regulator of heat. *J Appl Physiol.*  
353 1955;7:355–64.



- 354 Irving L, Schmidt-Nielsen K, Abrahamson NSB. On the melting points of animal fats in cold  
355 climates. *Physiol Zool*. 1957;30:93–105.
- 356 Johnsen HK, Rognum A, Nilssen KJ, Blix AS. Seasonal changes in the relative importance of  
357 different avenues of heat loss in resting and running reindeer. *Acta Physiol Scand*  
358 [Internet]. 1985 Jan;123(1):73–9. Available from:  
359 <https://onlinelibrary.wiley.com/doi/10.1111/j.1748-1716.1985.tb07563.x>
- 360 Kricun ME. Red-yellow marrow conversion: Its effect on the location of some solitary bone  
361 lesions. *Skeletal Radiol*. 1985;14:10–9.
- 362 Käkälä R, Hyvärinen H. Site-specific fatty acid composition in adipose tissues of several  
363 northern aquatic and terrestrial mammals. *Comp Biochem Physiol*. 1996;115B:501–14.
- 364 Lawrie RA, Ledward DA. *Lawrie's meat science*. 7th ed. Boca Raton: CRC Press; 2006.
- 365 Leat WMF, Cox RW. Fundamental aspects of adipose tissue growth. In: Lawrence TLJ, editor.  
366 *Growth in animals*. London: Butterworth; 1980. p. 137–74.
- 367 Lecka-Czernik B, Baroi S, Stechschulte LA, Chougule AS. Marrow fat—a new target to treat  
368 bone diseases? *Curr Osteoporos Rep*. 2018;16:123–9.
- 369 Li Z, Hardij J, Bagchi DP, Scheller EL, MacDougald OA. Development, regulation, metabolism  
370 and function of bone marrow adipose tissues. *Bone*. 2018;110:134–40.
- 371 Meng M, West G, Irving L. Fatty acid composition of caribou bone marrow. *Comp Biochem*  
372 *Physiol*. 1969;30:187–91.
- 373 Moore SG, Lawson KL. Red and yellow marrow in the femur: Age-related changes in  
374 appearance at MR imaging. *Radiol*. 1990; 175:219–23.
- 375 Morin E. Rethinking the emergence of bone grease procurement. *J Anthr Arch*. 2020; 59: article  
376 number: 101178.2020.

- 377 Mustonen A-M, Käkälä R, Nieminen P. Different fatty acid composition in central and peripheral  
378 adipose tissues of the American mink (*Mustela vison*) Comp Biochem Physiol A.  
379 2007;147:903–10.
- 380 Mustonen A-M, Käkälä R, Asikainen J, Nieminen P. Selective fatty acid mobilization from  
381 adipose tissues of the pheasant (*Phasianus colchicus mongolicus*) during food  
382 deprivation. Physiol Biochem Zool. 2009;82: 531–540.
- 383 Nikolaidis MG, Mougios V. Effects of exercise on the fatty-acid composition of blood and tissue  
384 lipids. Sports Med. 2004;34:1051–76.
- 385 Nieminen P, Rouvinen-Watt K, Collins D, Grant J, Mustonen A-M.. Fatty acid profiles and  
386 relative mobilization during fasting in adipose tissue depots of the American marten  
387 (*Martes americana*). Lipids. 2006;413:231–240.
- 388 Pond CM. An evolutionary and functional view of mammalian adipose tissue. Proc Nutr  
389 Soc. 1992;51:367–77.
- 390 Pond, CM, Mattacks CA, Colby RH, Tyler NJC. The anatomy, chemical composition and  
391 maximum glycolytic capacity of adipose tissue in wild Svalbard reindeer (*Rangifer*  
392 *tarandus platyrhynchus*) in winter. J Zool Lond. 1993;229:17–40.
- 393 Pond CM. The evolution of mammalian adipose tissues. In: Symonds ME, editor. Adipose tissue  
394 biology. New York: Springer Science+Business Media LLC; 2017. p. 1–59.
- 395 Raclot T. Selective mobilization of fatty acids from adipose tissue triacylglycerols. Prog Lipid  
396 Res. 2003;42:257–88.
- 397 Raclot T, Groscolas R. Differential mobilization of white adipose tissue fatty acids according to  
398 chain length, unsaturation, and positional isomerism. J Lipid Res. 1993;34:1515–26.

- 399 Raclot T, Mioskowski E, Bach AC, Groscolas R. Selectivity of fatty acid mobilization: a general  
400 metabolic feature of adipose tissue. *Am J Physiol Regul Integr Comp Physiol*.  
401 1995;269:R1060–7.
- 402 Scheller EL, Doucette CR, Learman BS, Cawthorn WP, Khandaker S, Schell B, et al. Region-  
403 specific variation in the properties of skeletal adipocytes reveals regulated and  
404 constitutive marrow adipose tissues. *Nat Commun*. 2015;6:1–15.
- 405 Schmidt-Nielsen K. Melting of human fats as related to their location in the body. *Acta Physiol*  
406 *Scand*. 1946;12:123–9.
- 407 Snyder WS, Cook M, Nasset E, Karhausen L, Tipton I. Report of the task group on reference  
408 man. Oxford: Pergamon Press; 1975.
- 409 Soppela P, Nieminen M, Saarela S, Hissa R. The influence of ambient temperature on  
410 metabolism and body temperature of newborn and growing reindeer calves (*Rangifer*  
411 *tarandus tarandus* L.). *Comp Biochem Physiol*. 1986;83:371–86.
- 412 Soppela P, Nieminen M. The effect of wintertime undernutrition on the fatty acid composition of  
413 leg bone marrow fats in reindeer (*Rangifer tarandus tarandus* L.). *Comp Biochem*  
414 *Physiol B Biochem Mol Biol*. 2001;128:63–72. [https://doi.org/10.1016/S1096-](https://doi.org/10.1016/S1096-4959(00)00297-9)  
415 [4959\(00\)00297-9](https://doi.org/10.1016/S1096-4959(00)00297-9)
- 416 Soppela P, Nieminen M. Effect of moderate wintertime undernutrition on fatty acid composition  
417 of adipose tissues of reindeer (*Rangifer tarandus tarandus* L.). *Comp Biochem Physiol A*  
418 *Mol Integr Physiol*. 2002;132:403–9. [https://doi.org/10.1016/S1095-6433\(02\)00040-5](https://doi.org/10.1016/S1095-6433(02)00040-5)
- 419 Steiner-Bogdaszewska Z, Tajchman K, Domaradzki P, Florek M. Composition of fatty acids in  
420 bone marrow of red deer from various ecosystems and different categories. *Molecules*  
421 2022; 27, 2511. <https://doi.org/10.3390/molecules27082511>

- 422 Stillwell W. An introduction to biological membranes: composition, structure and function. 2nd  
423 ed. London: Elsevier; 2016.
- 424 Tavassoli M, Yoffey JM. Bone marrow: structure and function. New York: Alan R. Liss, Inc.;  
425 1985.
- 426 Toral PG, Bernard L, Chilliard Y, Glasser F. Diet-induced variations in milk fatty acid  
427 composition have minor effects on the estimated melting point of milk fat in cows, goats,  
428 and ewes: Insights from a meta-analysis. *J Dairy Sci.* 2013;96:1232–6.
- 429 Turner JC. Adaptive strategies of selective fatty acid deposition in the bone marrow of desert  
430 bighorn sheep. *Comp Biochem Physiol.* 1979;62A:599–604.
- 431 Weldenogduad M, Pokharel K, Niiranen L, Soppela P, Ammosov I, Honkatukia M, et al. 2021.  
432 Adipose gene expression profiles reveal novel insights into the adaptation of northern  
433 Eurasian semi-domestic reindeer (*Rangifer tarandus*). *Commun Biol.* 2021;4:1170. DOI:  
434 10.1038/s42003-021-02703-z
- 435 Wood JD, Enser M, Fisher AV, Nute GR, Sheard PR, Richardson RI, et al. Fat deposition, fatty  
436 acid composition and meat quality: A review. *Meat Sci.* 2008;78:343–58.

437 **List of Figures:**

438

439 Fig 1. Anatomical sites sampled for this study. The numbers correspond to tissues listed in Table  
440 1.

441

442 Fig 2. FA composition in the caribou limbs: a) percentage of FA (calculated out of crude fat); b)  
443 weighted melting point; c) percentage of polyunsaturated FA (PUFA); d)  $\Delta^9$  desaturase index; e)  
444 %short chain saturated FA; f) n-6/n-3 FA ratio. Note the change of scale in c). The shaded areas  
445 correspond to areas of suspected significant hematopoiesis. In this and the following figure, the  
446 data points correspond to the mean for the two animals. The summed percentage of PUFA  
447 (%PUFA) includes these FA: *cis*-9,12 18:2; *cis*-9,12,15 18:3; *cis*-6,9,12,15 18:4; *cis*-11,14 20:2;  
448 *cis*-8,11,14 20:3; *cis*-5,8,11,14 20:4; *cis*-5,8,11,14,17 20:5; *cis*-7,10,13,16 22:4; *cis*-4,7,10,13,16  
449 22:5; *cis*-7,10,13,16,19 22:5; *cis*-4,7,10,13,16,19 22:6. The percentage of short chain saturated  
450 FA (%short chain saturated FA) is the sum of 14:0 and 15:0. The  $\Delta^9$  desaturase index was  
451 derived as follows: (*cis*-9 14:1 + *cis*-9 16:1 + *cis*-9 18:1)/(14:0 + *cis*-9 14:1 + 16:0 + *cis*-9 16:1 +  
452 18:0 + *cis*-9 18:1). The n-6/n-3 ratio was obtained using this equation: n-6 PUFA/n-3 PUFA.  
453 Data from Table 2–3 and Supplemental material (datafile S1).

454

455 Fig 3. FA in the axial and appendicular skeleton: a)  $\Delta^9$  desaturase index in muscle tissues; b)  
456  $\Delta^9$  desaturase index in cancellous marrow; c) percentage of short chain saturated FA in  
457 cancellous marrow; d) n-6/n-3 ratio in cancellous marrow. Comparisons for marrow exclude the  
458 shaft cavities. Data from Tables 2–3 and Supplemental material (datafile S1). Abbreviations: c.

459 marrow=cancellous marrow; hum=humerus; rul=radio-ulna; mc=metacarpal; fem=femur;

460 tib=tibia; mt=metatarsal; px=proximal metaphysis; ds=distal metaphysis.

461 Table 1. Crude fat and fatty acid content of various body tissues in caribou. The values are averages for the two  
462 animals.

| Anatomical site    | Tissue (Reference #)              | Crude fat <sup>1</sup><br>(%, wet basis) | Total fatty acids<br>(%, crude fat basis) | Total fatty acids <sup>1</sup><br>(%, wet basis) |
|--------------------|-----------------------------------|------------------------------------------|-------------------------------------------|--------------------------------------------------|
| Mandible           | Marrow (1)                        | 60.1                                     | 78.0                                      | 46.8                                             |
| Cervical vertebrae | Cancellous marrow (2)             | 28.0                                     | 70.9                                      | 19.9                                             |
|                    | Meat (3)                          | 5.5                                      | 69.8                                      | 3.9                                              |
| Thoracic vertebrae | Cancellous marrow (4)             | 21.2                                     | 79.2                                      | 16.8                                             |
|                    | Meat (5)                          | 5.0                                      | 65.5                                      | 3.3                                              |
| Lumbar vertebrae   | Cancellous marrow (6)             | 23.2                                     | 76.5                                      | 17.8                                             |
|                    | Meat (7)                          | 7.3                                      | 64.3                                      | 4.7                                              |
| Rib                | Cancellous marrow (8)             | 17.2                                     | 75.9                                      | 13.0                                             |
|                    | Meat (9)                          | 9.7                                      | 84.1                                      | 7.5                                              |
| Sternum            | Cancellous marrow (10)            | 32.2                                     | 68.0                                      | 21.5                                             |
|                    | Meat (11)                         | 26.6                                     | 62.4                                      | 17.2                                             |
| Scapula            | Marrow (12)                       | 51.2                                     | 79.8                                      | 40.7                                             |
|                    | Cancellous marrow (13)            | 12.1                                     | 77.2                                      | 9.3                                              |
|                    | Meat (14)                         | 4.8                                      | 54.3                                      | 2.6                                              |
| Humerus            | Prox. metaphysis cancellous (15)  | 38.0                                     | 67.0                                      | 25.4                                             |
|                    | Prox. shaft marrow (16)           | 84.6                                     | 72.6                                      | 61.3                                             |
|                    | Distal shaft marrow (17)          | 75.1                                     | 75.5                                      | 56.8                                             |
|                    | Distal metaphysis cancellous (18) | 19.1                                     | 67.9                                      | 13.1                                             |
|                    | Meat (19)                         | 6.3                                      | 42.1                                      | 2.7                                              |
| Radio-ulna         | Prox. metaphysis cancellous (20)  | 14.5                                     | 70.4                                      | 10.6                                             |
|                    | Prox. shaft marrow (21)           | 75.4                                     | 85.2                                      | 64.0                                             |
|                    | Distal shaft marrow (22)          | 76.9                                     | 84.9                                      | 65.1                                             |
|                    | Distal metaphysis cancellous (23) | 15.6                                     | 71.4                                      | 11.2                                             |
|                    | Meat (24)                         | 11.3                                     | 17.7                                      | 2.0                                              |
| Carpals            | Cancellous marrow (25)            | 10.4                                     | 69.6                                      | 7.1                                              |
| Metacarpal         | Prox. metaphysis cancellous (26)  | 7.5                                      | 69.1                                      | 5.1                                              |
|                    | Prox. shaft marrow (27)           | 70.2                                     | 81.6                                      | 57.2                                             |
|                    | Distal shaft marrow (28)          | 64.5                                     | 77.6                                      | 50.1                                             |
|                    | Distal metaphysis cancellous (29) | 9.5                                      | 74.6                                      | 7.2                                              |
| Anterior phalanx 1 | Marrow (30)                       | 75.1                                     | 78.8                                      | 59.2                                             |
| Anterior phalanx 2 | Marrow (31)                       | 74.3                                     | 77.6                                      | 57.7                                             |
| Pelvis             | Marrow (32)                       | 68.9                                     | 69.7                                      | 47.6                                             |
|                    | Cancellous marrow (33)            | 24.1                                     | 80.0                                      | 19.4                                             |

| Anatomical site     | Tissue (Reference #)                  | Crude fat <sup>1</sup><br>(%, wet basis) | Total fatty acids<br>(%, crude fat basis) | Total fatty acids <sup>1</sup><br>(%, wet basis) |
|---------------------|---------------------------------------|------------------------------------------|-------------------------------------------|--------------------------------------------------|
|                     | Meat (34)                             | 4.2                                      | 56.1                                      | 2.3                                              |
| Femur               | Prox. metaphysis cancellous (35)      | 32.7                                     | 77.4                                      | 25.3                                             |
|                     | Prox. shaft marrow (36)               | 75.3                                     | 81.2                                      | 61.2                                             |
|                     | Distal shaft marrow (37)              | 74.3                                     | 85.1                                      | 63.1                                             |
|                     | Distal metaphysis cancellous (38)     | 30.5                                     | 81.6                                      | 24.9                                             |
|                     | Meat (39)                             | 10.2                                     | 62.3                                      | 6.4                                              |
| Tibia               | Prox. metaphysis cancellous (40)      | 30.6                                     | 77.3                                      | 23.1                                             |
|                     | Prox. shaft marrow (41)               | 78.9                                     | 85.7                                      | 67.6                                             |
|                     | Distal shaft marrow (42)              | 72.2                                     | 78.7                                      | 56.8                                             |
|                     | Distal metaphysis cancellous          | 20.7                                     | 79.3                                      | 16.4                                             |
|                     | Meat (43)                             | 7.0                                      | 78.0                                      | 5.4                                              |
| Calcaneus           | Marrow (44)                           | 55.7                                     | 85.9                                      | 46.5                                             |
| Tarsals             | Cancellous marrow (45)                | 7.7                                      | 73.8                                      | 5.7                                              |
| Metatarsal          | Prox. metaphysis cancellous (46)      | 12.7                                     | 72.6                                      | 9.2                                              |
|                     | Prox. shaft marrow (47)               | 79.0                                     | 74.9                                      | 59.1                                             |
|                     | Distal shaft marrow (48)              | 72.3                                     | 79.5                                      | 57.1                                             |
|                     | Distal metaphysis cancellous (49)     | 15.9                                     | 77.1                                      | 12.2                                             |
| Posterior phalanx 1 | Marrow (51)                           | 71.5                                     | 80.2                                      | 57.3                                             |
| Posterior phalanx 2 | Marrow (52)                           | 63.5                                     | 83.2                                      | 52.8                                             |
| Miscellaneous       | Skin (53)                             | 3.5                                      | 21.3                                      | 0.8                                              |
|                     | Backfat (54)                          | 89.8                                     | 74.7                                      | 66.8                                             |
|                     | Tongue (55)                           | 33.1                                     | 71.3                                      | 23.7                                             |
|                     | Lungs and windpipe (56)               | 10.0                                     | 80.2                                      | 7.7                                              |
| Mean and st. dev.   | Cancellous marrow <sup>1-2</sup>      | 20.1 ±9.1                                | 74.5 ±4.5                                 | 15.0 ±6.7                                        |
|                     | axial skeleton only <sup>1</sup>      | 19.5 ±8.3                                | 74.6 ±4.3                                 | 14.5 ±5.9                                        |
|                     | metaphyseal regions only <sup>1</sup> | 20.6 ±10.0                               | 73.8 ±4.8                                 | 15.3 ±7.5                                        |
|                     | Diaphyseal marrow <sup>3</sup>        | 74.9 ±5.0                                | 80.2 ±4.5                                 | 60.0 ±4.7                                        |
|                     | Meat                                  | 10.9 ±9.2                                | 60.7 ±17.4                                | 6.8 ±6.7                                         |

463

464 <sup>1</sup>The low values for crude fat and Total fat weight (%, wet basis) for the cancellous marrow are, in part, due to the  
465 presence of bone fragments in the samples.

466 <sup>2</sup>Cancellous marrow includes the following: vertebrae, ribs, sternum, scapulae, pelvis, metaphyseal regions of long  
467 bones, carpals, tarsals. The axial skeleton includes all of these bones to the exclusion of the long bones.

468 <sup>3</sup>Diaphyseal marrow includes all of the shaft portions of the long bones. Although not “true” long bones, metapodials  
469 are treated here as long bones due to their large marrow cavity.



Table 2. Fatty acid profile and calculated melting point of lipid extracted from varying body tissues in caribou. The values are averages for the two animals.

| Anatomical site | Tissue (Reference #)              | Fatty acid (% by weight) |      |                    |      |                    |                     |                       |                     | $\Delta^9$ desatur. Index <sup>2</sup> | Melting Point (°C) |
|-----------------|-----------------------------------|--------------------------|------|--------------------|------|--------------------|---------------------|-----------------------|---------------------|----------------------------------------|--------------------|
|                 |                                   | 14:0                     | 16:0 | <i>cis</i> -9 16:1 | 18:0 | <i>cis</i> -9 18:1 | <i>cis</i> -11 18:1 | <i>cis</i> -9,12 18:2 | Others <sup>1</sup> |                                        |                    |
| Mandible        | Marrow (1)                        | 1.6                      | 33.9 | 0.9                | 27.2 | 29.4               | 1.0                 | 0.5                   | 5.5                 | 0.33                                   | 48.6               |
| Cervical vert.  | Cancellous marrow (2)             | 1.7                      | 31.8 | 0.9                | 26.7 | 30.4               | 1.2                 | 1.1                   | 6.3                 | 0.34                                   | 47.2               |
|                 | Meat (3)                          | 1.4                      | 30.0 | 0.9                | 25.9 | 33.3               | 1.4                 | 1.7                   | 5.4                 | 0.37                                   | 45.1               |
| Thoracic vert.  | Cancellous marrow (4)             | 1.9                      | 33.7 | 1.0                | 27.0 | 29.1               | 1.1                 | 1.1                   | 5.0                 | 0.33                                   | 48.3               |
|                 | Meat (5)                          | 1.3                      | 29.1 | 1.0                | 26.9 | 30.7               | 1.5                 | 3.7                   | 5.7                 | 0.36                                   | 43.6               |
| Lumbar vert.    | Cancellous marrow (6)             | 1.6                      | 31.2 | 1.1                | 26.9 | 32.6               | 1.1                 | 0.8                   | 4.8                 | 0.36                                   | 46.7               |
|                 | Meat (7)                          | 1.4                      | 29.4 | 0.9                | 28.2 | 32.7               | 1.4                 | 1.4                   | 4.6                 | 0.36                                   | 46.0               |
| Ribs            | Cancellous marrow (8)             | 2.3                      | 33.0 | 0.9                | 29.9 | 27.5               | 1.0                 | 0.9                   | 4.5                 | 0.30                                   | 49.5               |
|                 | Meat (9)                          | 1.7                      | 30.0 | 0.9                | 28.8 | 30.6               | 1.1                 | 1.5                   | 5.3                 | 0.34                                   | 46.7               |
| Sternum         | Cancellous marrow (10)            | 2.3                      | 33.3 | 1.1                | 27.0 | 29.1               | 1.1                 | 1.1                   | 5.2                 | 0.33                                   | 48.1               |
|                 | Meat (11)                         | 1.7                      | 30.8 | 1.6                | 27.5 | 32.1               | 1.0                 | 1.2                   | 4.1                 | 0.36                                   | 46.4               |
| Scapula         | Marrow (12)                       | 2.6                      | 37.7 | 1.1                | 27.0 | 24.5               | 1.0                 | 0.9                   | 5.2                 | 0.28                                   | 50.6               |
|                 | Cancellous marrow (13)            | 2.5                      | 34.7 | 1.1                | 27.0 | 27.4               | 1.1                 | 1.0                   | 5.4                 | 0.31                                   | 49.1               |
|                 | Meat (14)                         | 1.4                      | 26.1 | 1.2                | 19.4 | 42.6               | 1.5                 | 2.4                   | 5.5                 | 0.48                                   | 39.4               |
| Humerus         | Prox. metaphysis cancellous (15)  | 1.4                      | 28.9 | 1.3                | 21.3 | 38.6               | 1.4                 | 1.0                   | 6.3                 | 0.44                                   | 42.8               |
|                 | Prox. shaft marrow (16)           | 1.9                      | 32.0 | 0.9                | 27.8 | 29.5               | 1.1                 | 0.6                   | 6.3                 | 0.33                                   | 48.5               |
|                 | Distal shaft marrow (17)          | 2.0                      | 32.2 | 0.9                | 28.6 | 28.6               | 1.2                 | 0.6                   | 6.0                 | 0.32                                   | 49.0               |
|                 | Distal metaphysis cancellous (18) | 1.2                      | 27.2 | 1.5                | 19.8 | 41.5               | 1.8                 | 0.9                   | 6.1                 | 0.47                                   | 41.0               |
|                 | Meat (19)                         | 1.2                      | 24.3 | 1.4                | 17.3 | 44.6               | 1.8                 | 2.8                   | 6.6                 | 0.52                                   | 36.5               |
| Radio-ulna      | Prox. metaphysis cancellous (20)  | 1.1                      | 28.1 | 1.7                | 18.6 | 42.6               | 1.8                 | 0.8                   | 5.3                 | 0.48                                   | 40.4               |
|                 | Prox. shaft marrow (21)           | 1.2                      | 26.5 | 1.1                | 23.9 | 39.1               | 1.5                 | 0.6                   | 6.2                 | 0.44                                   | 43.3               |
|                 | Distal shaft marrow (22)          | 0.4                      | 17.6 | 2.1                | 12.4 | 57.3               | 3.5                 | 0.6                   | 6.2                 | 0.66                                   | 32.0               |
|                 | Distal metaphysis cancellous (23) | 0.6                      | 21.7 | 3.0                | 10.6 | 54.2               | 3.5                 | 0.7                   | 5.6                 | 0.64                                   | 32.6               |
|                 | Meat (24)                         | 2.8                      | 25.3 | 1.6                | 15.5 | 39.8               | 1.5                 | 3.2                   | 10.5                | 0.49                                   | 35.3               |

| Anatomical site | Tissue (Reference #)              | Fatty acid (% by weight) |      |                    |      |                    |                     |                       |                     | $\Delta^9$ desatur. Index <sup>2</sup> | Melting Point (°C) |
|-----------------|-----------------------------------|--------------------------|------|--------------------|------|--------------------|---------------------|-----------------------|---------------------|----------------------------------------|--------------------|
|                 |                                   | 14:0                     | 16:0 | <i>cis</i> -9 16:1 | 18:0 | <i>cis</i> -9 18:1 | <i>cis</i> -11 18:1 | <i>cis</i> -9,12 18:2 | Others <sup>1</sup> |                                        |                    |
| Carpals         | Cancellous marrow (25)            | 0.4                      | 17.1 | 2.9                | 9.0  | 60.1               | 4.0                 | 0.9                   | 5.8                 | 0.70                                   | 29.4               |
| Metacarpal      | Prox. metaphysis cancellous (26)  | 0.5                      | 20.1 | 4.1                | 8.0  | 56.0               | 4.6                 | 0.8                   | 5.9                 | 0.68                                   | 29.8               |
|                 | Prox. shaft marrow (27)           | 0.2                      | 14.5 | 2.4                | 9.3  | 61.8               | 4.0                 | 0.8                   | 6.9                 | 0.73                                   | 28.8               |
|                 | Distal shaft marrow (28)          | 0.3                      | 16.0 | 2.5                | 9.0  | 62.0               | 3.2                 | 0.8                   | 6.2                 | 0.72                                   | 29.2               |
|                 | Distal metaphysis cancellous (29) | 0.4                      | 19.0 | 3.1                | 8.3  | 58.8               | 4.2                 | 0.8                   | 5.4                 | 0.69                                   | 29.7               |
| Ant. phalanx 1  | Marrow (30)                       | 0.2                      | 14.7 | 2.3                | 8.0  | 63.0               | 4.3                 | 0.8                   | 6.8                 | 0.74                                   | 28.0               |
| Ant. phalanx 2  | Marrow (31)                       | 0.2                      | 14.5 | 2.3                | 8.4  | 63.2               | 4.0                 | 0.8                   | 6.6                 | 0.74                                   | 28.2               |
| Pelvis          | Marrow (32)                       | 2.3                      | 35.5 | 1.1                | 27.7 | 26.2               | 1.1                 | 0.9                   | 5.3                 | 0.29                                   | 49.9               |
|                 | Cancellous marrow (33)            | 1.7                      | 29.5 | 1.0                | 23.4 | 37.6               | 1.0                 | 0.8                   | 4.9                 | 0                                      | 44.1               |
|                 | Meat (34)                         | 1.1                      | 24.2 | 1.1                | 18.9 | 44.1               | 1.6                 | 3.3                   | 5.7                 | 0.51                                   | 37.4               |
| Femur           | Prox. metaphysis cancellous (35)  | 1.5                      | 30.1 | 1.2                | 23.5 | 36.2               | 1.2                 | 0.8                   | 5.5                 | 0.40                                   | 44.6               |
|                 | Prox. shaft marrow (36)           | 1.8                      | 32.0 | 0.8                | 29.4 | 28.4               | 0.9                 | 0.7                   | 5.9                 | 0.32                                   | 49.3               |
|                 | Distal shaft marrow (37)          | 1.6                      | 30.9 | 0.8                | 28.2 | 30.8               | 1.1                 | 0.6                   | 6.0                 | 0.34                                   | 48.0               |
|                 | Distal metaphysis cancellous (38) | 1.0                      | 26.9 | 1.3                | 19.8 | 42.3               | 2.0                 | 0.8                   | 5.9                 | 0.48                                   | 40.8               |
|                 | Meat (39)                         | 1.7                      | 30.5 | 1.2                | 22.3 | 36.2               | 1.4                 | 1.5                   | 5.3                 | 0.41                                   | 43.6               |
| Tibia           | Prox. metaphysis cancellous (40)  | 0.9                      | 25.0 | 1.4                | 17.8 | 46.9               | 1.8                 | 0.7                   | 5.4                 | 0.53                                   | 38.7               |
|                 | Prox. shaft marrow (41)           | 1.0                      | 27.1 | 1.5                | 20.2 | 41.8               | 1.9                 | 0.6                   | 5.9                 | 0.47                                   | 41.3               |
|                 | Distal shaft marrow (42)          | 0.3                      | 16.1 | 2.3                | 10.1 | 60.2               | 4.0                 | 0.7                   | 6.4                 | 0.70                                   | 30.0               |
|                 | Distal metaphysis cancellous      | 0.6                      | 21.7 | 3.3                | 9.1  | 55.9               | 4.0                 | 0.6                   | 4.7                 | 0.65                                   | 31.5               |
|                 | Meat (43)                         | 1.6                      | 27.8 | 1.7                | 16.1 | 45.8               | 1.5                 | 1.3                   | 4.3                 | 0.51                                   | 38.2               |
| Calcaneus       | Marrow (44)                       | 0.3                      | 16.9 | 2.8                | 9.4  | 59.6               | 4.0                 | 0.7                   | 6.2                 | 0.70                                   | 29.8               |
| Tarsals         | Cancellous marrow (45)            | 0.4                      | 19.7 | 3.2                | 7.7  | 59.3               | 4.4                 | 0.7                   | 4.7                 | 0.69                                   | 29.6               |
| Metatarsal      | Prox. metaphysis cancellous (46)  | 0.5                      | 20.6 | 3.0                | 8.6  | 57.4               | 4.3                 | 0.7                   | 4.9                 | 0.67                                   | 30.7               |
|                 | Prox. shaft marrow (47)           | 0.2                      | 15.6 | 2.4                | 8.4  | 61.1               | 5.7                 | 0.6                   | 5.8                 | 0.72                                   | 28.6               |
|                 | Distal shaft marrow (48)          | 0.3                      | 17.1 | 2.4                | 8.8  | 60.7               | 4.0                 | 0.6                   | 6.1                 | 0.71                                   | 29.7               |
|                 | Distal metaphysis cancellous (49) | 0.4                      | 19.3 | 3.0                | 7.6  | 59.7               | 4.4                 | 0.6                   | 5.0                 | 0.70                                   | 29.5               |

| Anatomical site | Tissue (Reference #)    | Fatty acid (% by weight) |      |                    |      |                    |                     |                       |                     | $\Delta^9$ desatur. Index <sup>2</sup> | Melting Point (°C) |
|-----------------|-------------------------|--------------------------|------|--------------------|------|--------------------|---------------------|-----------------------|---------------------|----------------------------------------|--------------------|
|                 |                         | 14:0                     | 16:0 | <i>cis</i> -9 16:1 | 18:0 | <i>cis</i> -9 18:1 | <i>cis</i> -11 18:1 | <i>cis</i> -9,12 18:2 | Others <sup>1</sup> |                                        |                    |
| Post. phalanx 1 | Marrow (51)             | 0.2                      | 14.6 | 2.6                | 7.0  | 63.9               | 4.8                 | 0.7                   | 6.2                 | 0.75                                   | 27.2               |
| Post. phalanx 2 | Marrow (52)             | 0.2                      | 14.6 | 2.1                | 7.3  | 64.6               | 4.5                 | 0.7                   | 6.2                 | 0.75                                   | 27.4               |
| Miscellaneous   | Skin (53)               | 1.6                      | 24.4 | 0.9                | 23.2 | 30.6               | 0.6                 | 1.5                   | 17.6                | 0.39                                   | 40.8               |
|                 | Backfat (54)            | 3.4                      | 33.9 | 1.5                | 26.9 | 28.8               | 0.9                 | 0.4                   | 4.2                 | 0.32                                   | 48.5               |
|                 | Tongue (55)             | 2.1                      | 35.1 | 1.3                | 22.4 | 31.8               | 1.5                 | 0.9                   | 4.8                 | 0.36                                   | 46.2               |
|                 | Lungs and windpipe (56) | 1.2                      | 29.1 | 1.4                | 21.1 | 40.2               | 1.7                 | 0.9                   | 4.4                 | 0.45                                   | 42.0               |

<sup>1</sup>See Supplementary material (datafile S1) for complete profiles

$$^2(cis-9\ 14:1 + cis-9\ 16:1 + cis-9\ 18:1) / (14:0 + cis-9\ 14:1 + 16:0 + cis-9\ 16:1 + 18:0 + cis-9\ 18:1)$$

Table 3. Polyunsaturated fatty acids family in lipids extracted from various body tissues in caribou.

| Anatomical site    | Tissue (Reference #)              | Fatty acid (% by weight) |                        |             | Ratio n-6/n-3 |
|--------------------|-----------------------------------|--------------------------|------------------------|-------------|---------------|
|                    |                                   | Total n-6 <sup>1</sup>   | Total n-3 <sup>1</sup> | Sum n-6+n-3 |               |
| Mandible           | Marrow (1)                        | 0.75                     | 0.33                   | 1.08        | 2.30          |
| Cervical vertebrae | Cancellous marrow (2)             | 1.51                     | 0.56                   | 2.07        | 2.72          |
|                    | Meat (3)                          | 2.29                     | 0.46                   | 2.74        | 5.03          |
| Thoracic vertebrae | Cancellous marrow (4)             | 1.27                     | 0.33                   | 1.61        | 3.82          |
|                    | Meat (5)                          | 5.09                     | 1.04                   | 6.13        | 4.91          |
| Lumbar vertebrae   | Cancellous marrow (6)             | 0.96                     | 0.34                   | 1.30        | 2.83          |
|                    | Meat (7)                          | 1.85                     | 0.45                   | 2.30        | 4.10          |
| Rib                | Cancellous marrow (8)             | 1.12                     | 0.29                   | 1.41        | 3.84          |
|                    | Meat (9)                          | 2.12                     | 0.56                   | 2.67        | 3.81          |
| Sternum            | Cancellous marrow (10)            | 1.33                     | 0.37                   | 1.70        | 3.58          |
|                    | Meat (11)                         | 1.48                     | 0.38                   | 1.86        | 3.85          |
| Scapula            | Marrow (12)                       | 1.02                     | 0.21                   | 1.23        | 4.99          |
|                    | Cancellous marrow (13)            | 1.20                     | 0.26                   | 1.47        | 4.55          |
|                    | Meat (14)                         | 3.11                     | 0.54                   | 3.65        | 5.73          |
| Humerus            | Prox. metaphysis cancellous (15)  | 1.18                     | 0.49                   | 1.67        | 2.39          |
|                    | Prox. shaft marrow (16)           | 0.72                     | 0.29                   | 1.01        | 2.52          |
|                    | Distal shaft marrow (17)          | 0.77                     | 0.27                   | 1.04        | 2.79          |
|                    | Distal metaphysis cancellous (18) | 1.12                     | 0.47                   | 1.59        | 2.41          |
|                    | Meat (19)                         | 4.09                     | 0.98                   | 5.07        | 4.19          |
| Radio-ulna         | Prox. metaphysis cancellous (20)  | 1.04                     | 0.49                   | 1.54        | 2.11          |
|                    | Prox. shaft marrow (21)           | 0.74                     | 0.39                   | 1.13        | 1.89          |
|                    | Distal shaft marrow (22)          | 0.77                     | 0.53                   | 1.30        | 1.47          |
|                    | Distal metaphysis cancellous (23) | 0.92                     | 0.58                   | 1.50        | 1.60          |
|                    | Meat (24)                         | 5.53                     | 2.31                   | 7.84        | 2.39          |
| Carpals            | Cancellous marrow (25)            | 1.04                     | 0.60                   | 1.64        | 1.72          |
| Metacarpal         | Prox. metaphysis cancellous (26)  | 1.40                     | 0.62                   | 2.02        | 2.28          |
|                    | Prox. shaft marrow (27)           | 0.97                     | 0.58                   | 1.55        | 1.67          |
|                    | Distal shaft marrow (28)          | 0.92                     | 0.60                   | 1.52        | 1.55          |
|                    | Distal metaphysis cancellous (29) | 1.10                     | 0.67                   | 1.77        | 1.65          |
| Anterior phalanx 1 | Marrow (30)                       | 0.96                     | 0.75                   | 1.71        | 1.29          |
| Anterior phalanx 2 | Marrow (31)                       | 0.96                     | 0.77                   | 1.73        | 1.26          |
| Pelvis             | Marrow (32)                       | 1.01                     | 0.26                   | 1.27        | 3.85          |
|                    | Cancellous marrow (33)            | 1.10                     | 0.41                   | 1.51        | 2.65          |
|                    | Meat (34)                         | 4.41                     | 0.80                   | 5.21        | 5.53          |
| Femur              | Prox. metaphysis cancellous (35)  | 0.97                     | 0.37                   | 1.34        | 2.62          |

| Anatomical site     | Tissue (Reference #)              | Fatty acid (% by weight) |                        |             | Ratio n-6/n-3 |
|---------------------|-----------------------------------|--------------------------|------------------------|-------------|---------------|
|                     |                                   | Total n-6 <sup>1</sup>   | Total n-3 <sup>1</sup> | Sum n-6+n-3 |               |
|                     | Prox. shaft marrow (36)           | 0.85                     | 0.29                   | 1.14        | 2.88          |
|                     | Distal shaft marrow (37)          | 0.74                     | 0.33                   | 1.07        | 2.23          |
|                     | Distal metaphysis cancellous (38) | 0.97                     | 0.50                   | 1.46        | 1.93          |
|                     | Meat (39)                         | 1.91                     | 0.47                   | 2.38        | 4.08          |
| Tibia               | Prox. metaphysis cancellous (40)  | 0.93                     | 0.45                   | 1.37        | 2.06          |
|                     | Prox. shaft marrow (41)           | 0.70                     | 0.36                   | 1.06        | 1.93          |
|                     | Distal shaft marrow (42)          | 0.76                     | 0.61                   | 1.37        | 1.24          |
|                     | Distal metaphysis cancellous      | 0.74                     | 0.61                   | 1.34        | 1.22          |
|                     | Meat (43)                         | 1.91                     | 0.50                   | 2.41        | 3.85          |
| Calcaneus           | Marrow (44)                       | 0.87                     | 0.65                   | 1.51        | 1.34          |
| Tarsals             | Cancellous marrow (45)            | 0.87                     | 0.67                   | 1.55        | 1.30          |
| Metatarsal          | Prox. metaphysis cancellous (46)  | 0.83                     | 0.63                   | 1.46        | 1.31          |
|                     | Prox. shaft marrow (47)           | 0.77                     | 0.60                   | 1.37        | 1.28          |
|                     | Distal shaft marrow (48)          | 0.76                     | 0.61                   | 1.37        | 1.24          |
|                     | Distal metaphysis cancellous (49) | 0.81                     | 0.63                   | 1.44        | 1.28          |
| Posterior phalanx 1 | Marrow (51)                       | 0.81                     | 0.79                   | 1.60        | 1.02          |
| Posterior phalanx 2 | Marrow (52)                       | 0.80                     | 0.82                   | 1.63        | 0.98          |
| Miscellaneous       | Skin (53)                         | 4.13                     | 1.87                   | 6.00        | 2.20          |
|                     | Backfat (54)                      | 0.54                     | 0.30                   | 0.84        | 1.82          |
|                     | Tongue (55)                       | 1.12                     | 0.39                   | 1.51        | 2.91          |
|                     | Lungs and windpipe (56)           | 1.19                     | 0.51                   | 1.70        | 2.32          |

<sup>1</sup>See Supplementary material (datafile S1) for complete profiles.

## List of Supplements

Datafile S1. Complete FA profiles for the two caribou individuals.

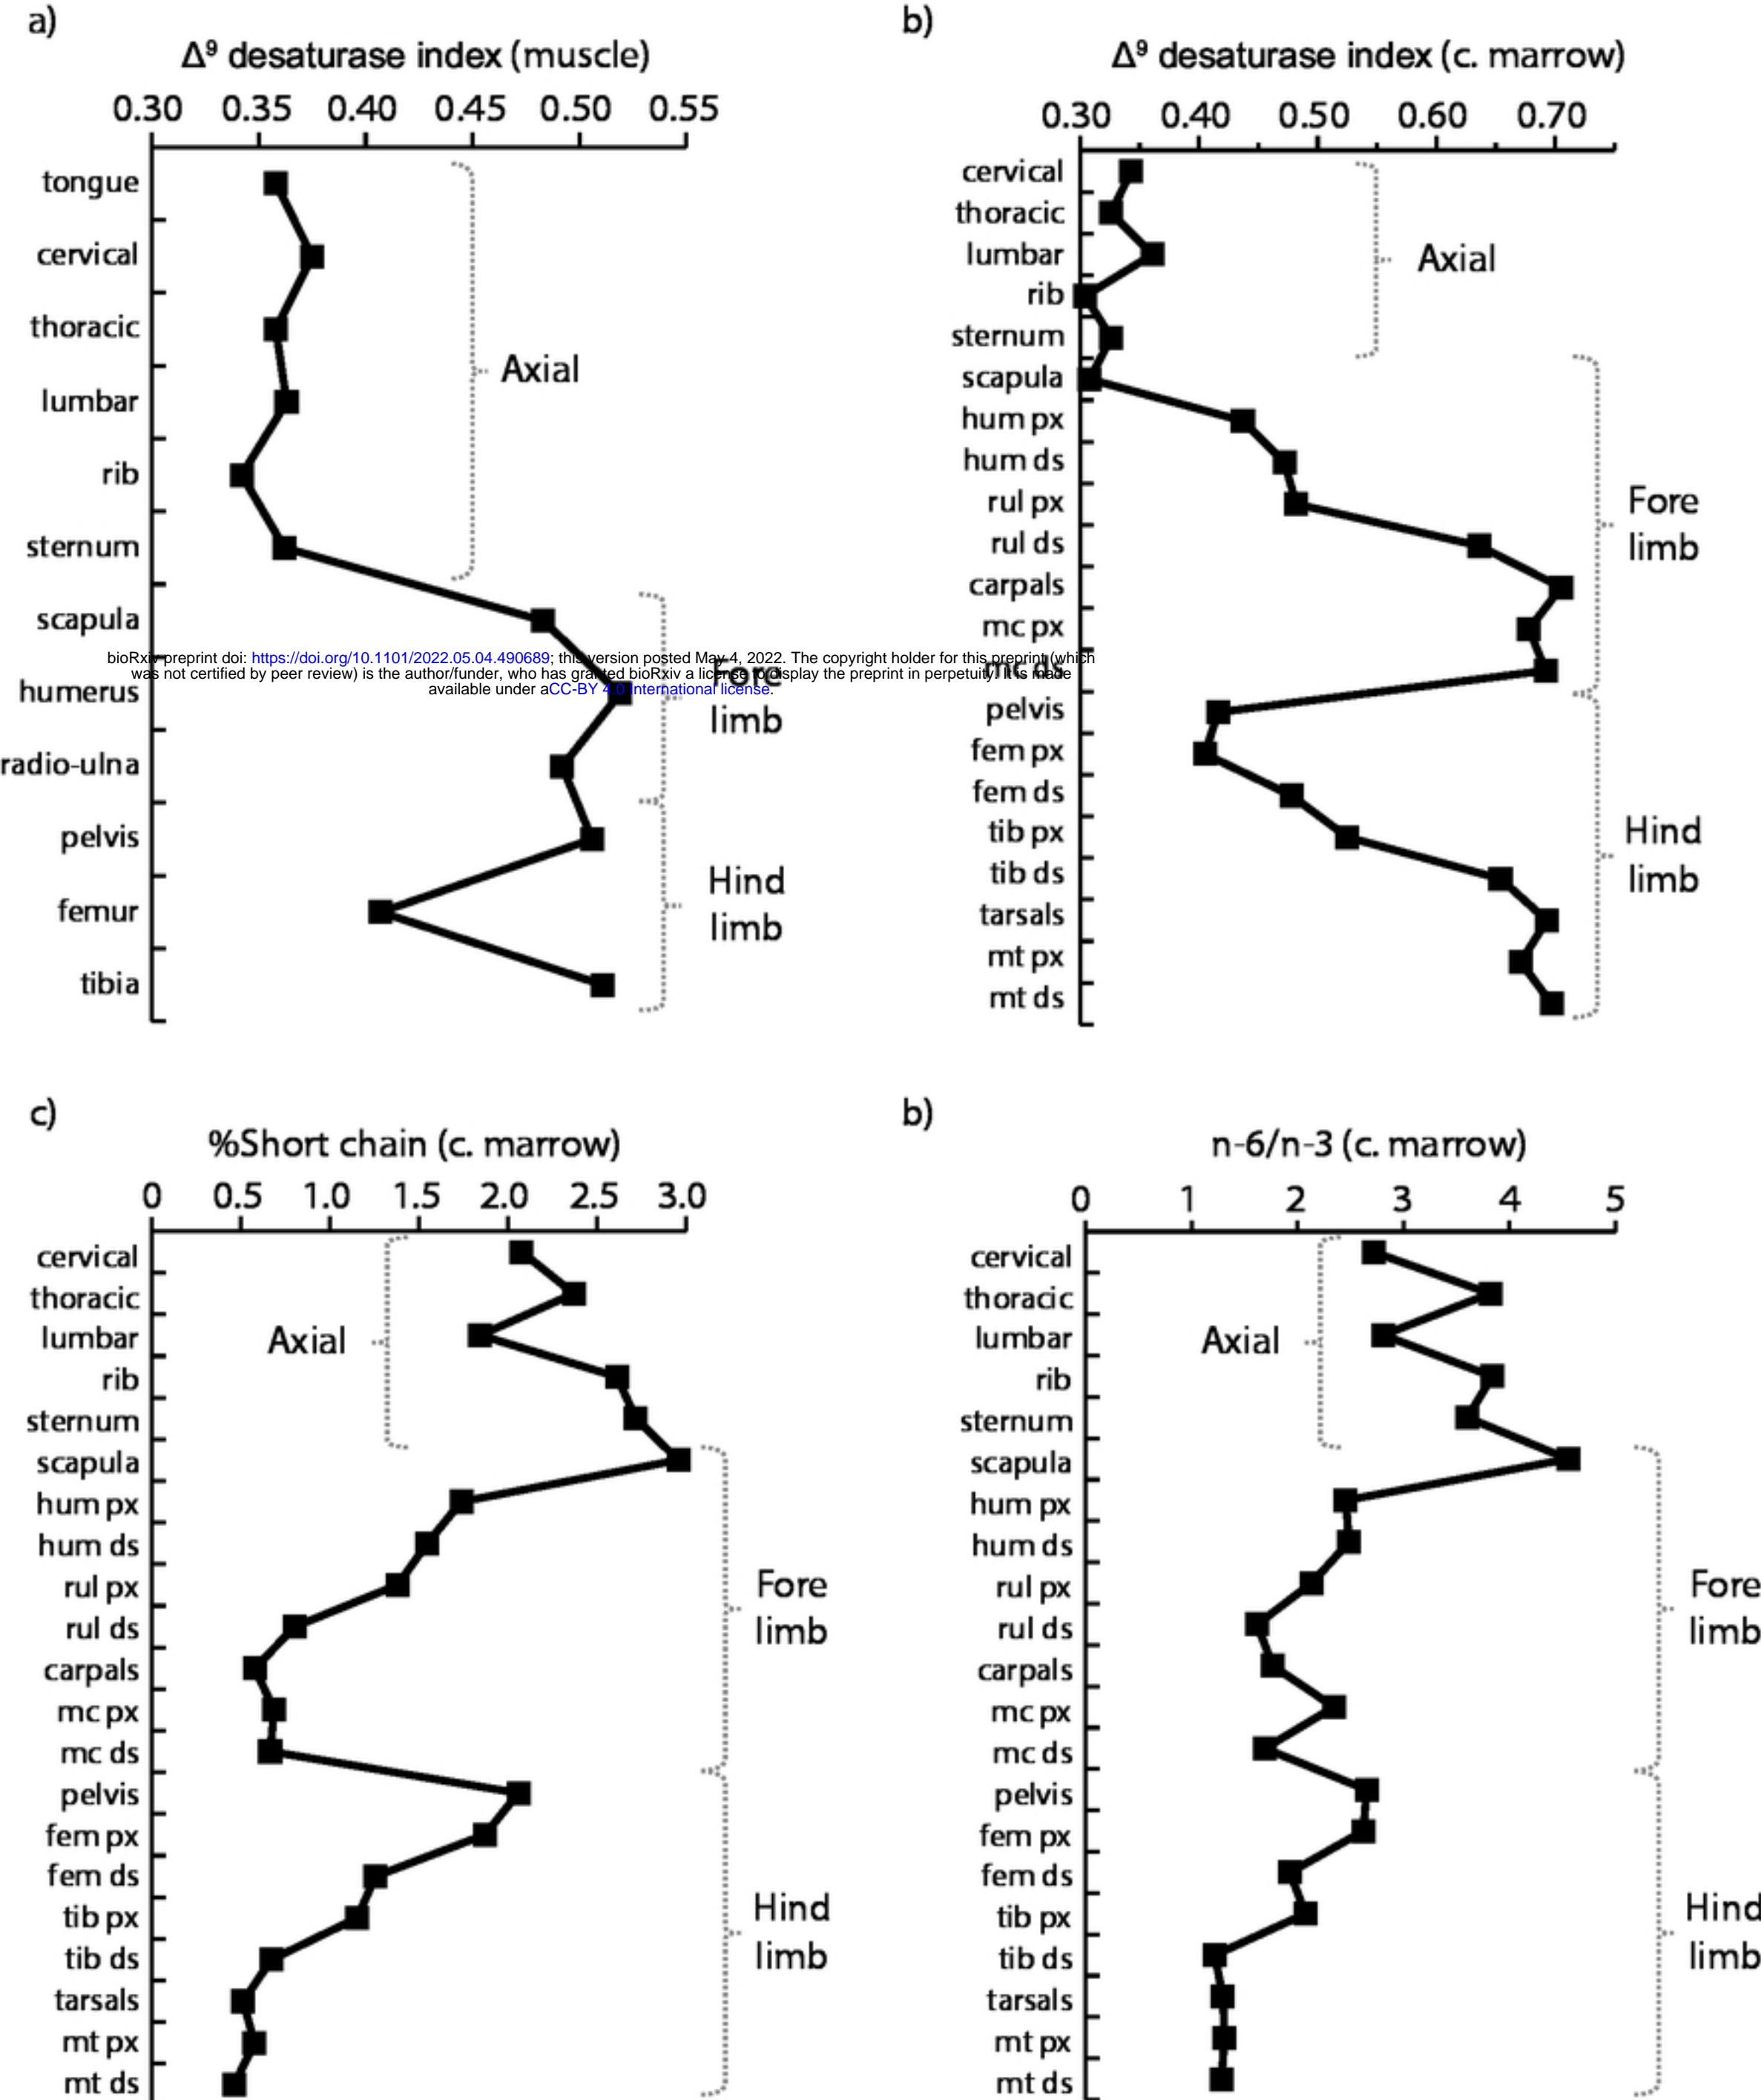

Figure 3

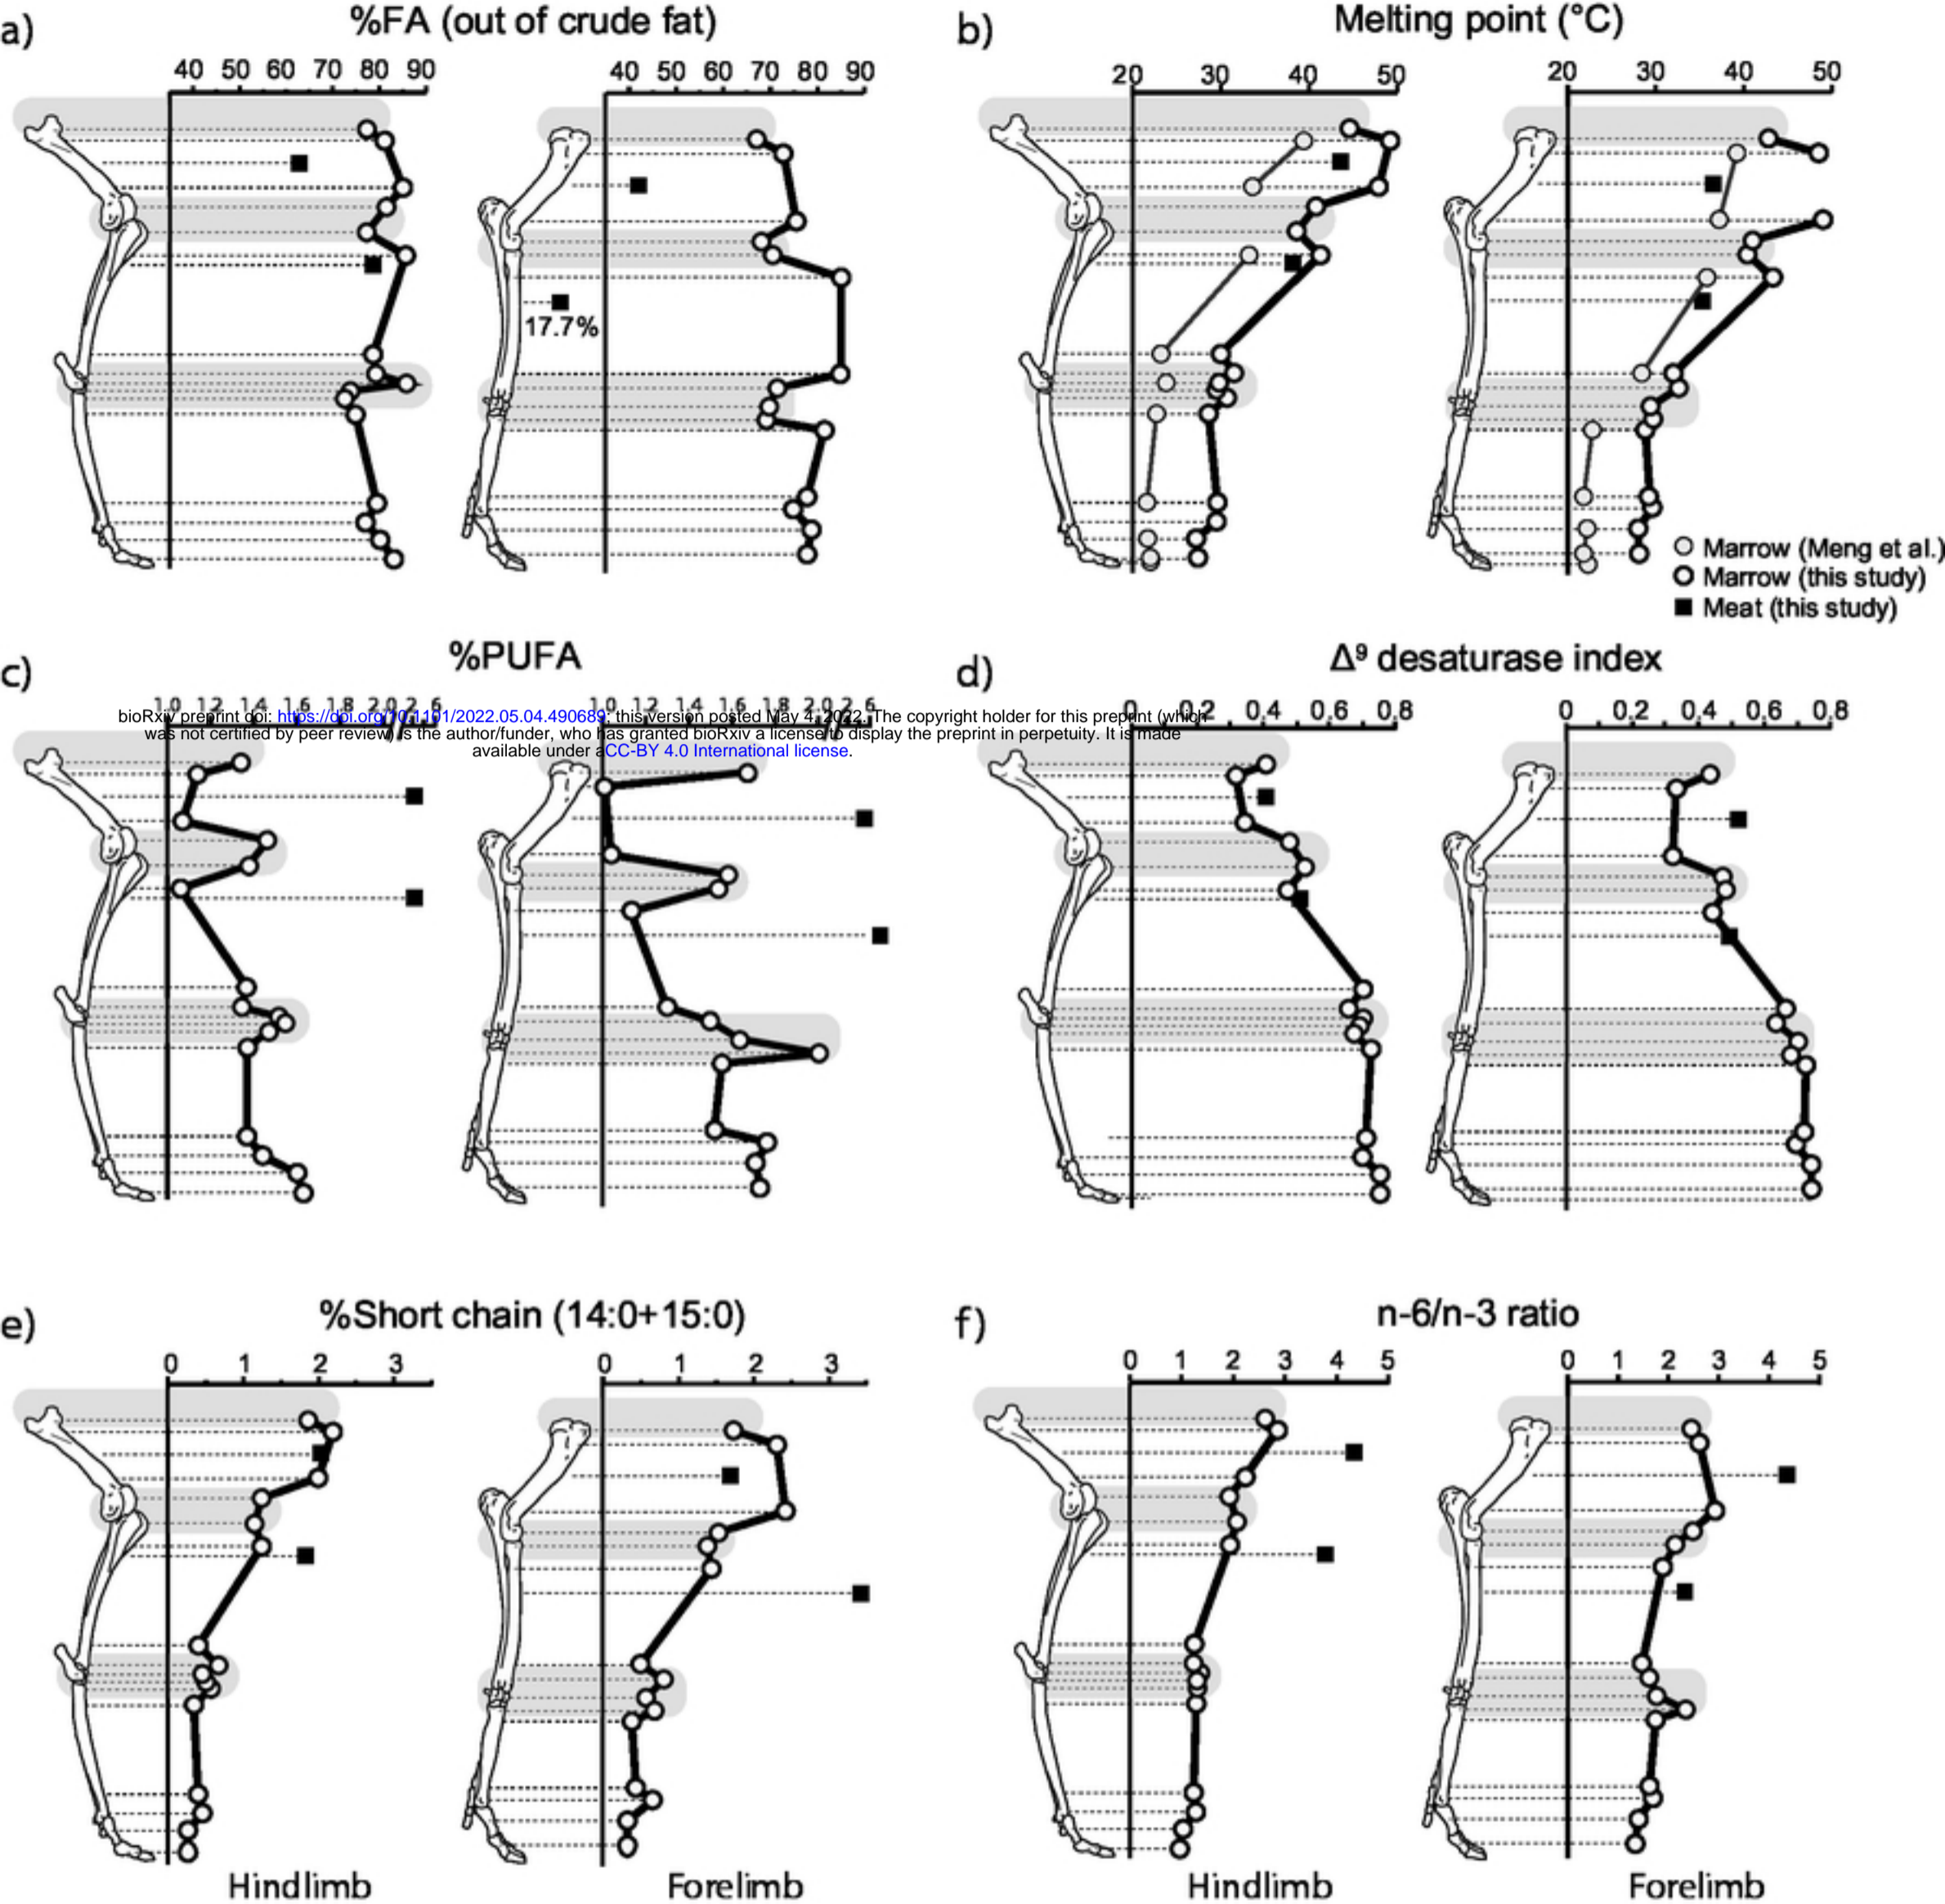

Figure 2



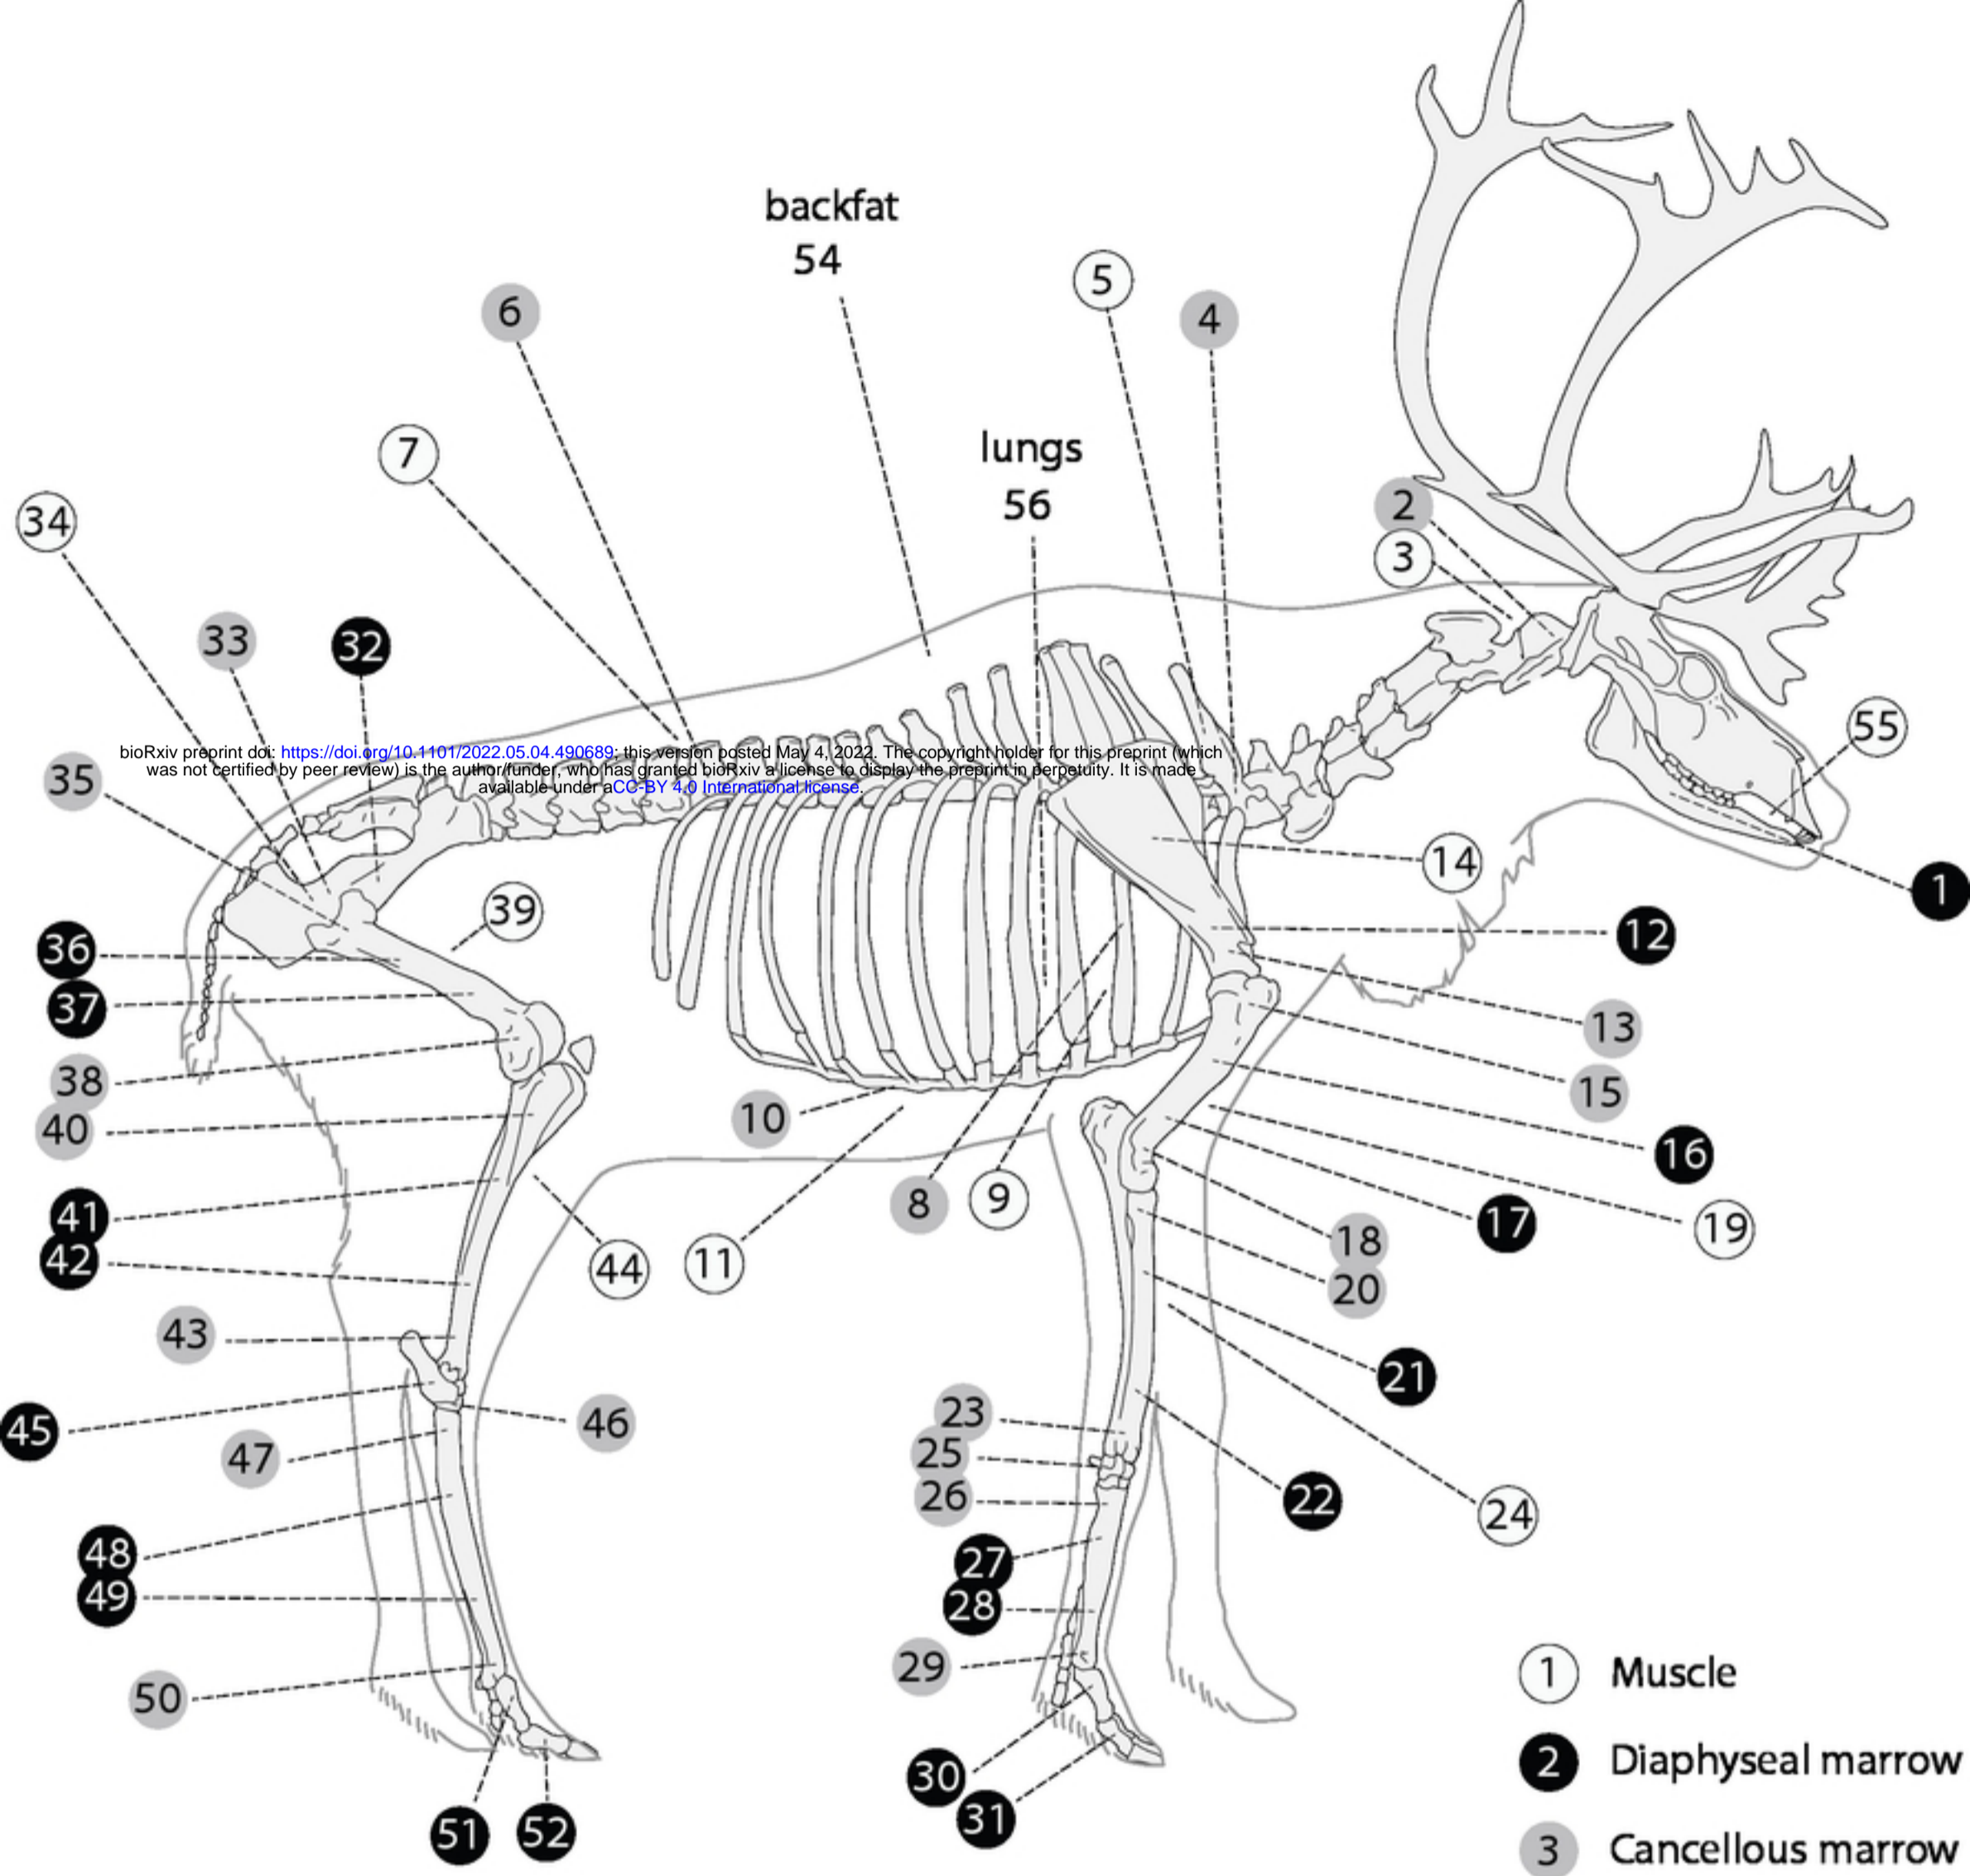

Figure 1
